# Supplementary material for: Intermolecular hydrogen bonding-assisted aggregation induced emission in quinolone–quinazoline conjugates and their potential use in acidochromism
Source: Royal Society of Chemistry journal article supplement (doi:10.1039/d3nj05832h), 2024-01-01
Supplement: d3nj05832h1.pdf [file d3nj05832h1.pdf]

## Intermolecular hydrogen bonding assisted aggregation induced emission in quinolone–quinazoline conjugates and their potential use in acidochromism

Irshad Ali,<sup>a+</sup> Bhupendra Kumar Dwivedi,<sup>a,b+</sup> Vishwa Deepak Singh,<sup>a</sup> and Daya Shankar Pandey<sup>a\*</sup>

Department of Chemistry, Institute of Science, Banaras Hindu University, Varanasi–221005, India

### Contents

| Page. No. |                                                                                                                             | Page       |
|-----------|-----------------------------------------------------------------------------------------------------------------------------|------------|
| 3.        | <sup>1</sup> H and <sup>13</sup> C NMR spectra of <b>A1</b>                                                                 | <b>S1</b>  |
| 4.        | <sup>1</sup> H and <sup>13</sup> C NMR spectra of <b>A2</b>                                                                 | <b>S2</b>  |
| 5.        | <sup>1</sup> H and <sup>13</sup> C NMR spectra of <b>A3</b>                                                                 | <b>S3</b>  |
| 6.        | <sup>1</sup> H and <sup>13</sup> C NMR spectra of <b>Q1</b>                                                                 | <b>S4</b>  |
| 7.        | <sup>1</sup> H and <sup>13</sup> C NMR spectra of <b>Q2</b>                                                                 | <b>S5</b>  |
| 8.        | <sup>1</sup> H and <sup>13</sup> C NMR spectra of <b>Q3</b>                                                                 | <b>S6</b>  |
| 9.        | IR spectra of <b>A1</b> , <b>A2</b> and <b>A3</b>                                                                           | <b>S7</b>  |
| 10.       | IR spectra of <b>Q1</b> , <b>Q2</b> and <b>Q3</b>                                                                           | <b>S8</b>  |
| 11.       | HRMS spectra of <b>Q1</b> and <b>Q2</b>                                                                                     | <b>S9</b>  |
| 12.       | HRMS spectra of <b>Q3</b>                                                                                                   | <b>S10</b> |
| 12.       | Solid–state emission spectrum of <b>Q1</b> , <b>Q2</b> and <b>Q3</b>                                                        | <b>S11</b> |
| 13.       | Absorption spectra of <b>Q1</b> , <b>Q2</b> , <b>Q3</b> and emission spectrum of <b>Q1</b>                                  | <b>S12</b> |
| 13.       | Plots between ; Stokes shift vs. $\Delta f$ and Stokes shift vs. $E_T$ (30)                                                 | <b>S13</b> |
| 14.       | Absorption spectra of <b>Q1</b> , <b>Q2</b> and <b>Q3</b> in THF/water                                                      | <b>S14</b> |
| 14.       | Emission spectra of <b>Q2</b> and <b>Q3</b> in THF/water                                                                    | <b>S15</b> |
| 15.       | A logarithmic view of the time–resolved fluorescence of <b>Q2</b> (a), <b>Q3</b> (b) in THF/water mixture (c = 50 $\mu$ M). | <b>S16</b> |
| 15.       | Powder XRD Pattern of <b>Q2</b> .                                                                                           | <b>S17</b> |
| 15.       | SEM images of <b>Q2</b> and <b>Q3</b> .                                                                                     | <b>S18</b> |
| 16.       | DLS spectra of <b>Q2</b> and <b>Q3</b> .                                                                                    | <b>S19</b> |
| 16.       | Emission spectra of <b>Q1</b> , <b>Q2</b> and <b>Q3</b> in methanol/glycerol.                                               | <b>S20</b> |
| 17.       | Crystal packing through $\pi$ – $\pi$ stacking                                                                              | <b>S21</b> |

|        |                                                                                                                                                                       |              |
|--------|-----------------------------------------------------------------------------------------------------------------------------------------------------------------------|--------------|
| 17.    | Absorption and Emission spectrum of <b>Q1</b> , <b>Q1+TFA</b> and <b>Q1+TFA+TEA</b>                                                                                   | <b>S22</b>   |
| 18.    | Absorption and Emission spectrum of <b>Q2</b> , <b>Q2+TFA</b> and <b>Q2+TFA+TEA</b>                                                                                   | <b>S23</b>   |
| 18.    | (a) Emission spectrum of Q3, with TFA titration (b) pKa calculation for Q3 and (c)quantitative relationship between emission intensity and TFA concentration of Q1-Q3 | <b>S24</b>   |
| 19.    | Frontier Molecular orbital of protonated <b>Q3</b> .                                                                                                                  | <b>S25</b>   |
| 19-23. | Tables.                                                                                                                                                               | <b>S1-S9</b> |

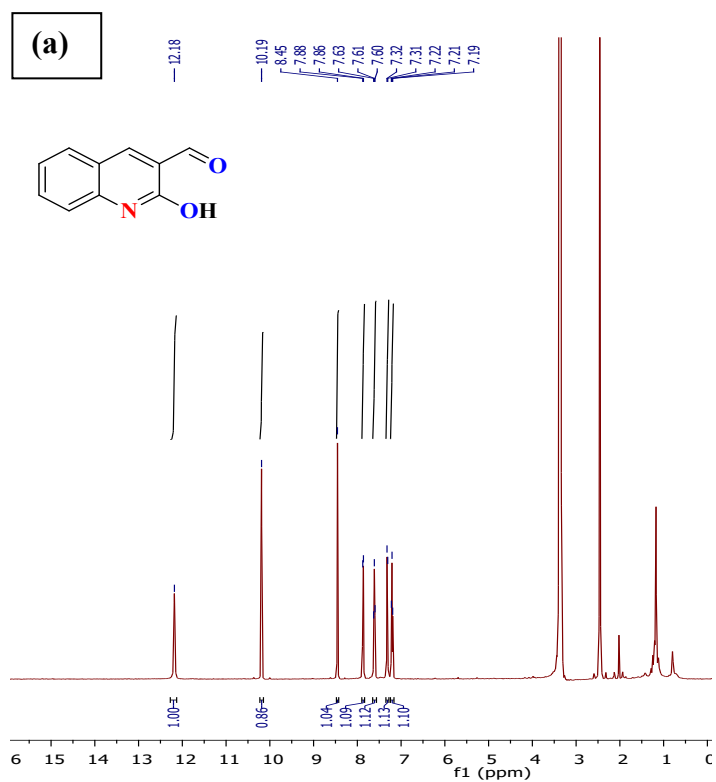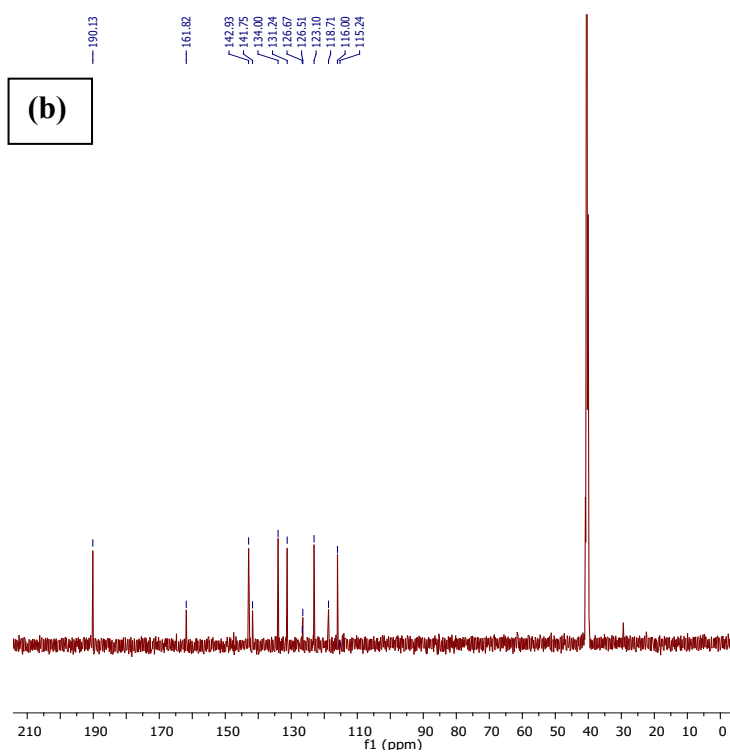

**Fig. S1**  $^1\text{H}$  (a) and  $^{13}\text{C}$  (b) NMR spectra of **A1**.

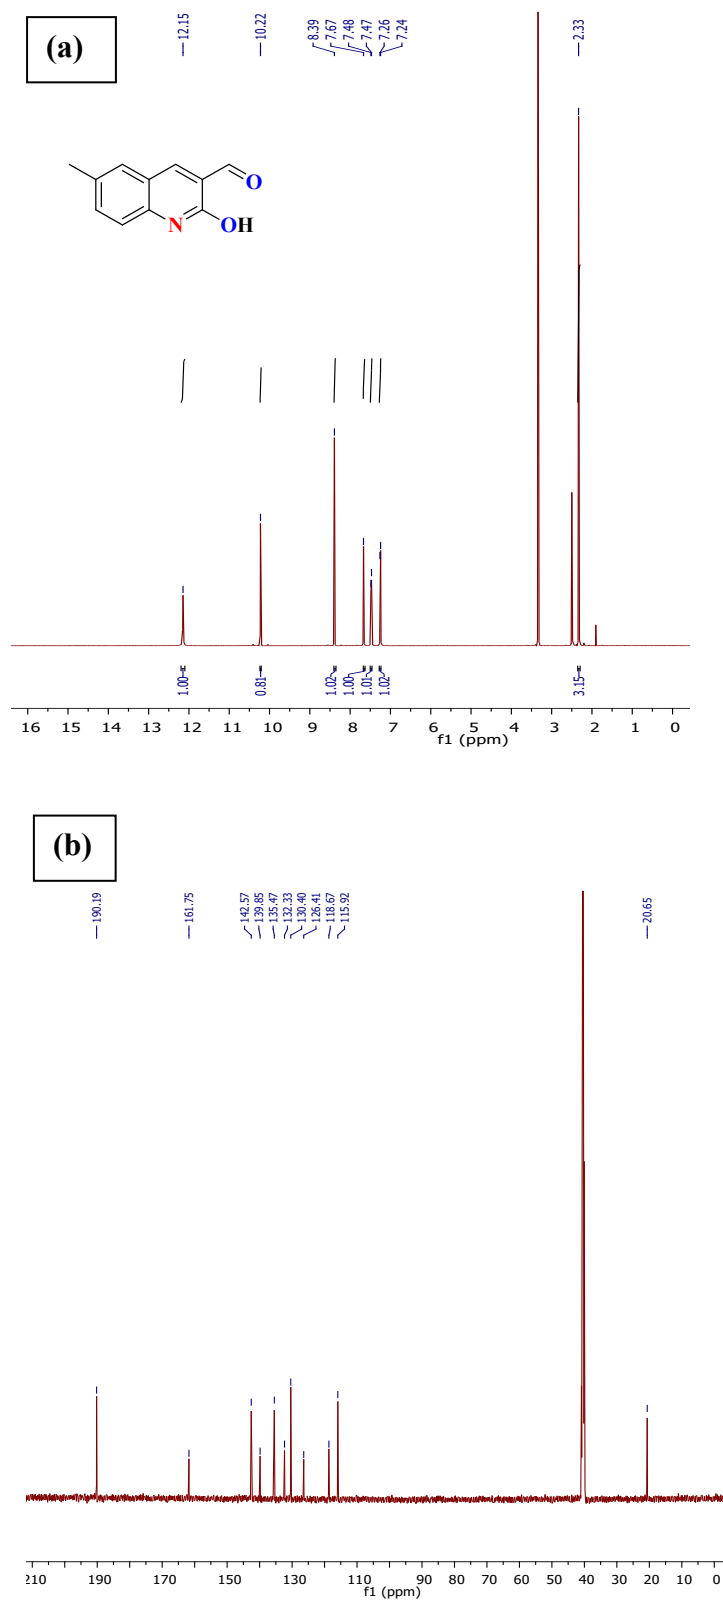

**Fig. S2**  $^1\text{H}$  (a) and  $^{13}\text{C}$  (b) NMR spectra of **A2**.

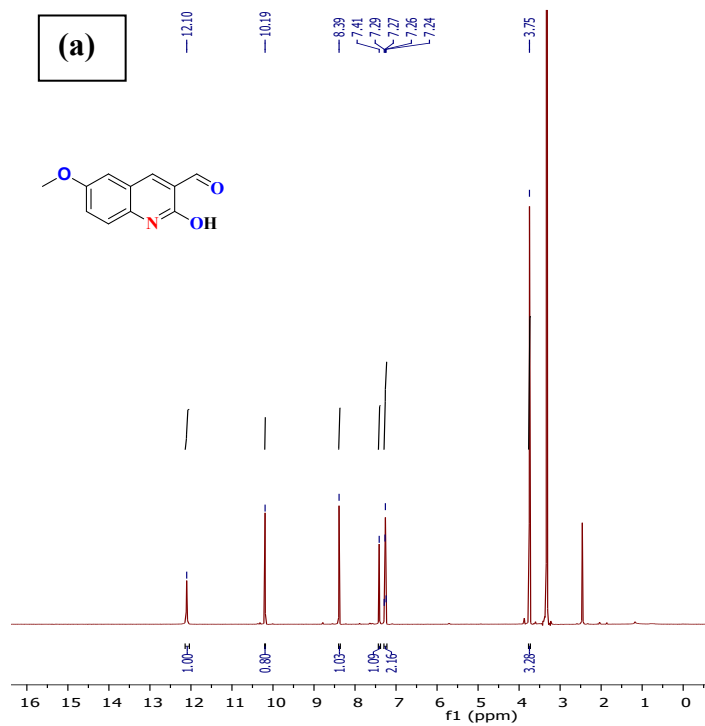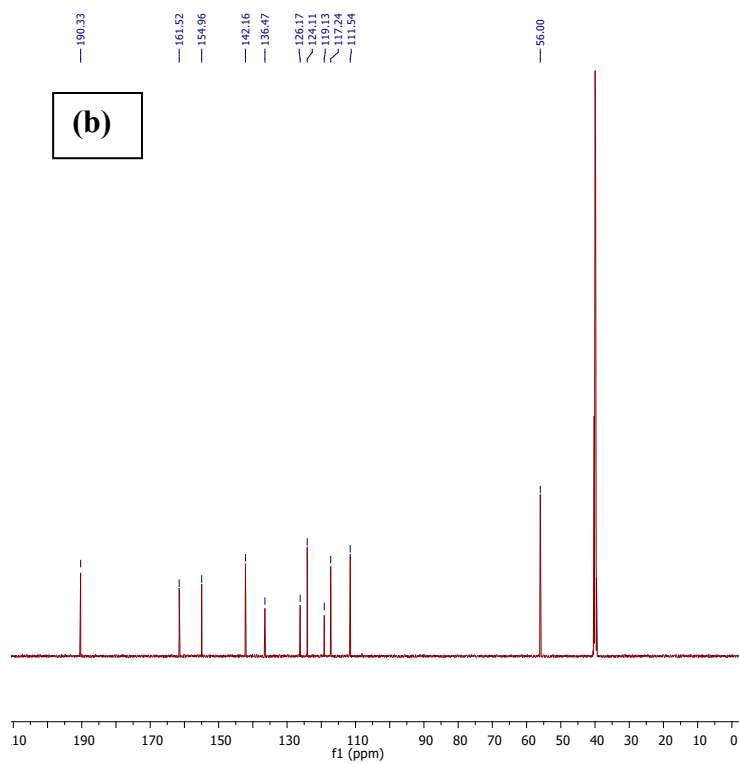

**Fig. S3**  $^1\text{H}$  (a) and  $^{13}\text{C}$  (b) NMR spectra of **A3**.

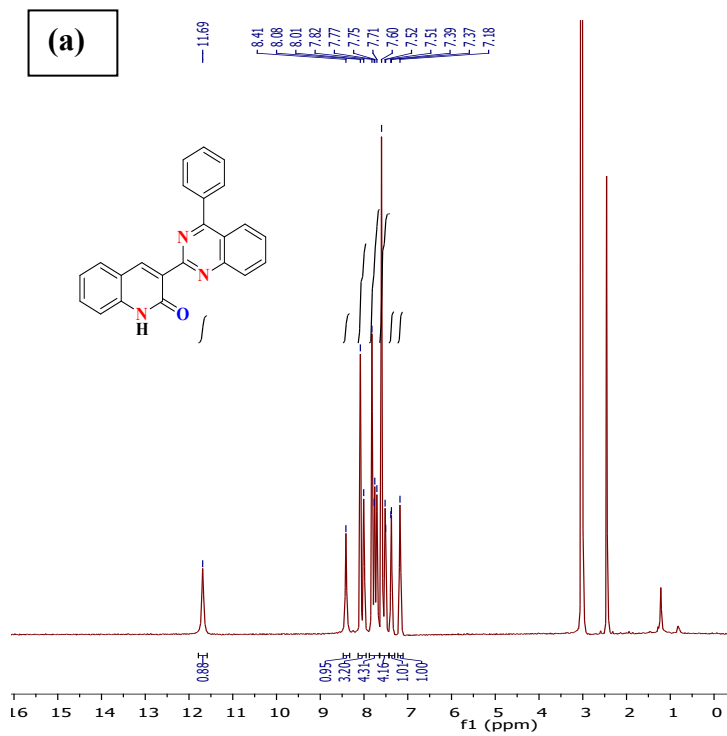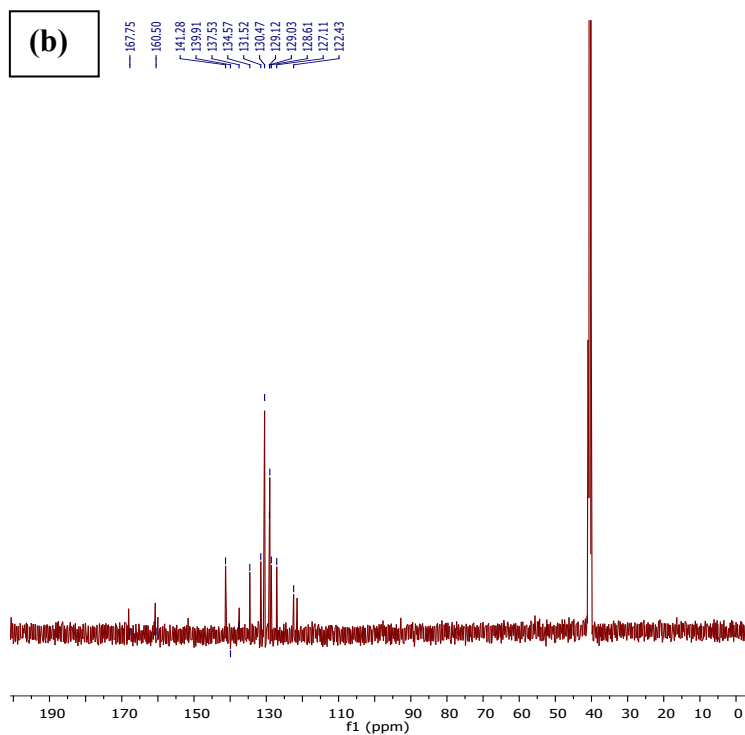

**Fig. S4**  $^1\text{H}$  (a) and  $^{13}\text{C}$  (b) NMR spectra of **Q1**.

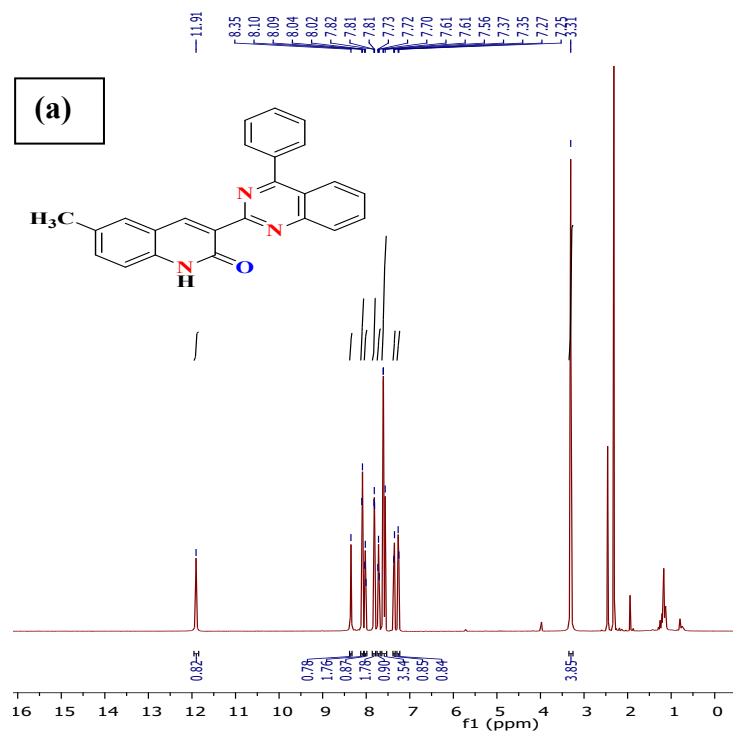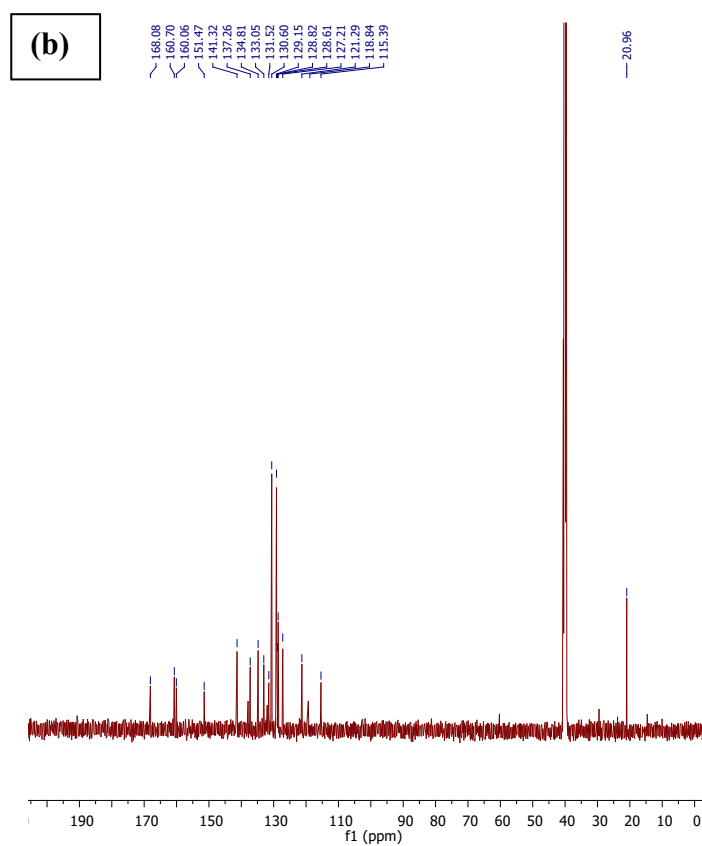

**Fig. S5**  $^1\text{H}$  (a) and  $^{13}\text{C}$  (b) NMR spectra of Q2.

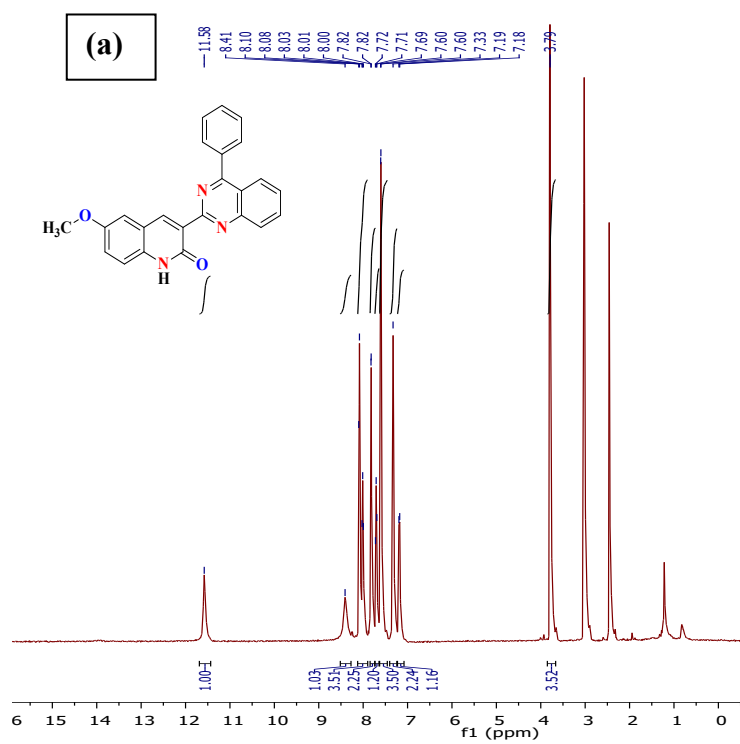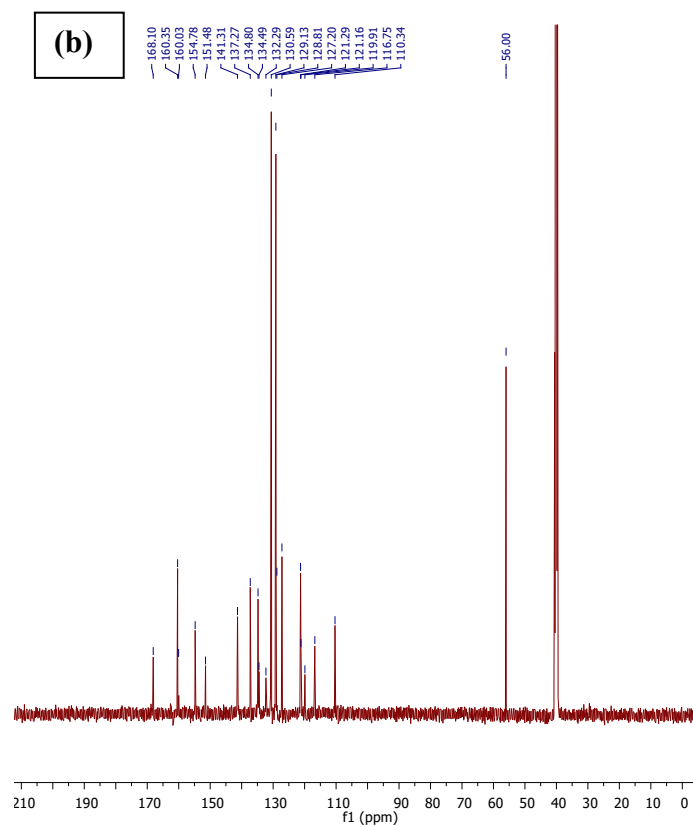

**Fig. S6**  $^1\text{H}$  (a) and  $^{13}\text{C}$  (b) NMR spectra of Q3.



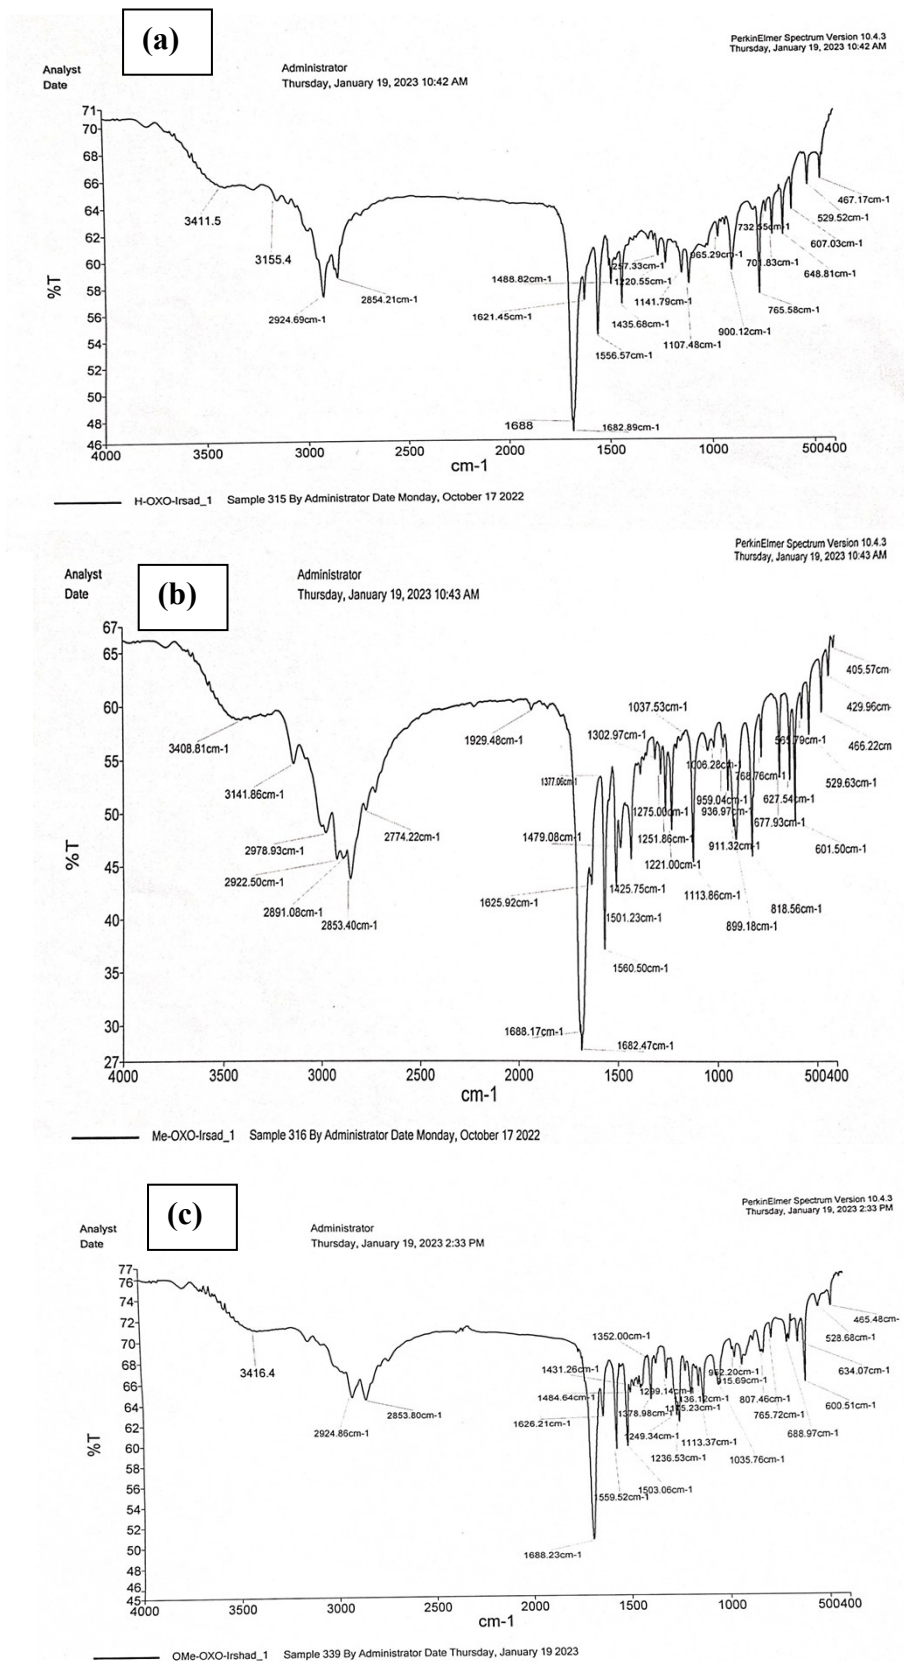

**Fig. S7** IR spectra of A1 (a), A2 (b) and A3 (c).

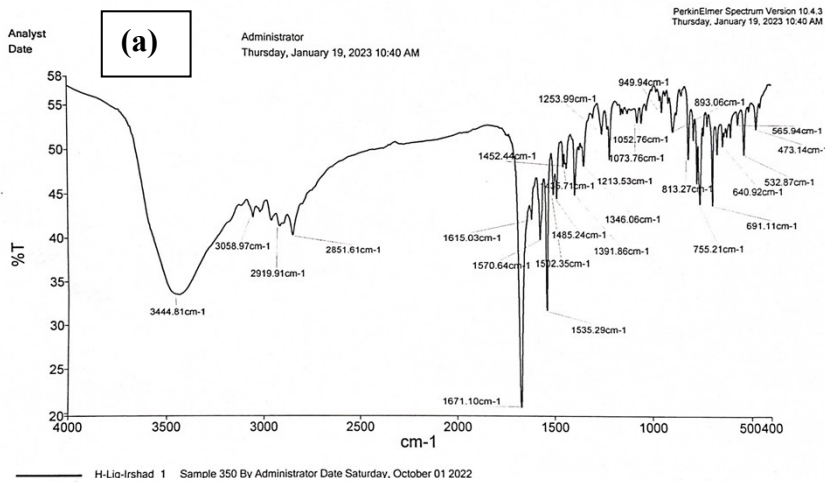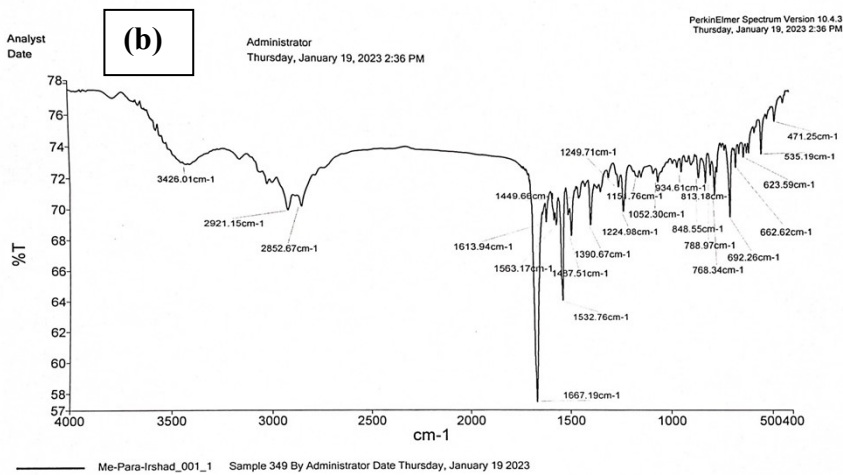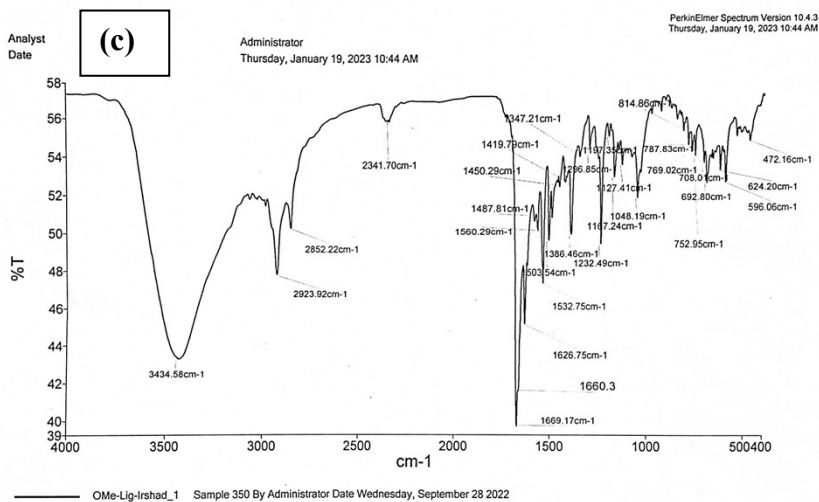

Fig. S8 IR spectra of Q1 (a), Q2 (b) and Q3 (c).

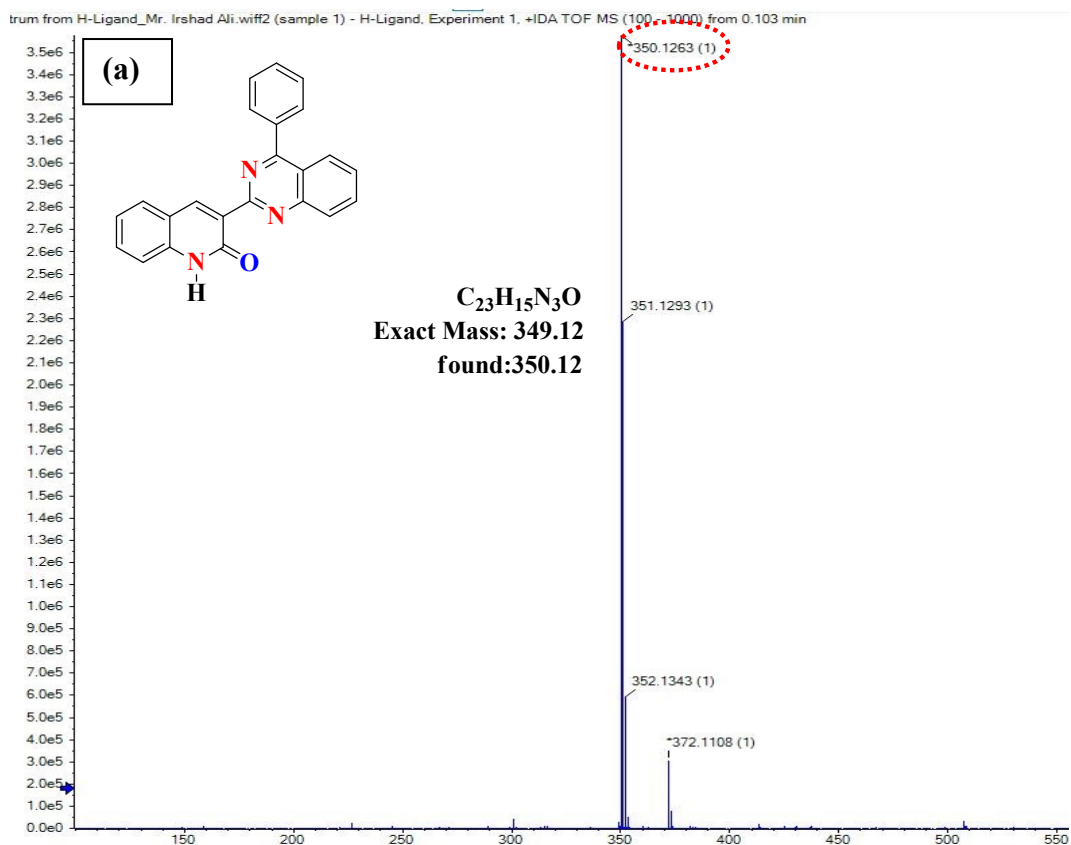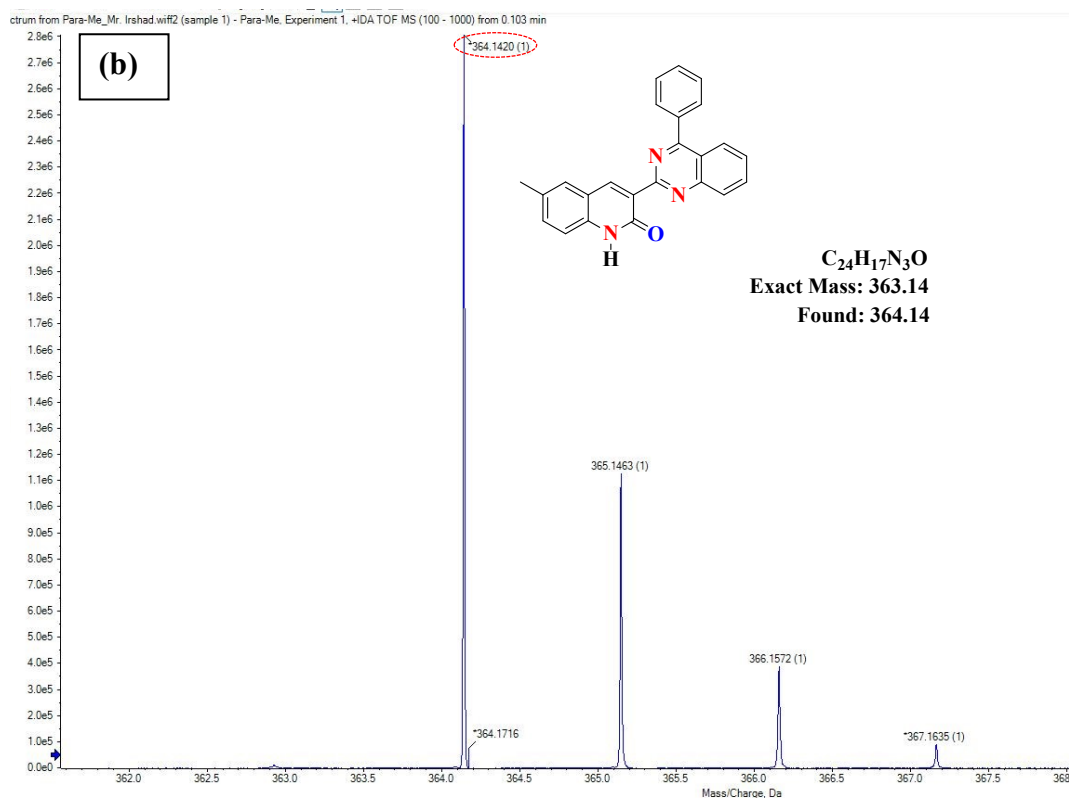

**Fig. S9** HRMS spectra of **Q1** (a) and **Q2** (b).

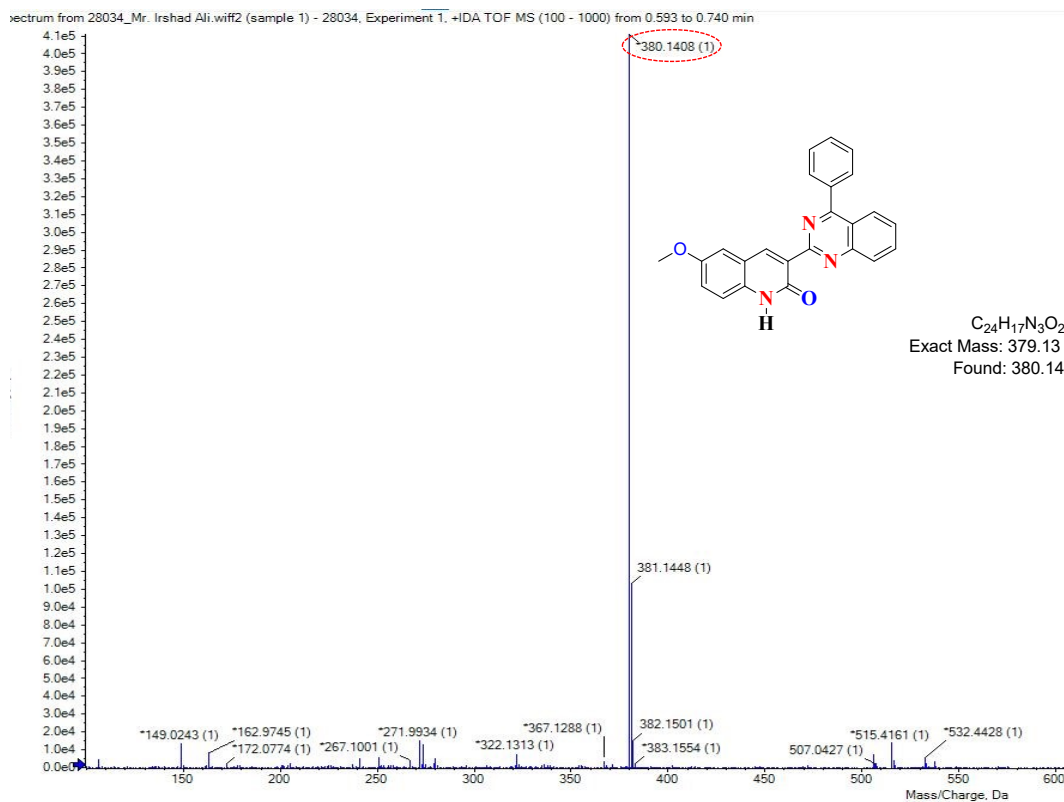

**Fig. S10** HRMS spectrum of **Q3**.

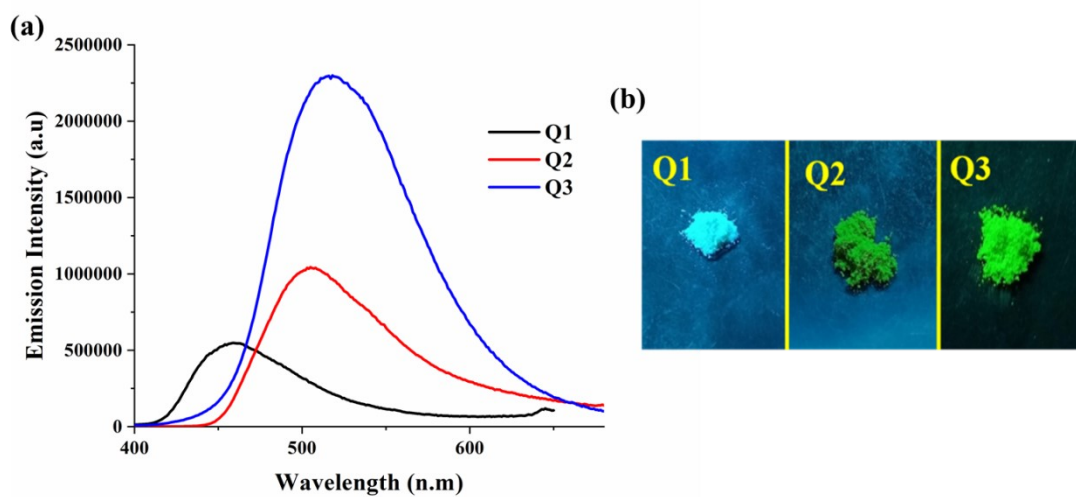

**Fig. S11** (a) Solid-state emission spectrum of **Q1**, **Q2**, and **Q3** ( $\lambda_{ex}$  = 337, 358, and 385 nm, respectively). (b) **Q1–Q3** under the UV radiation of 365 nm.

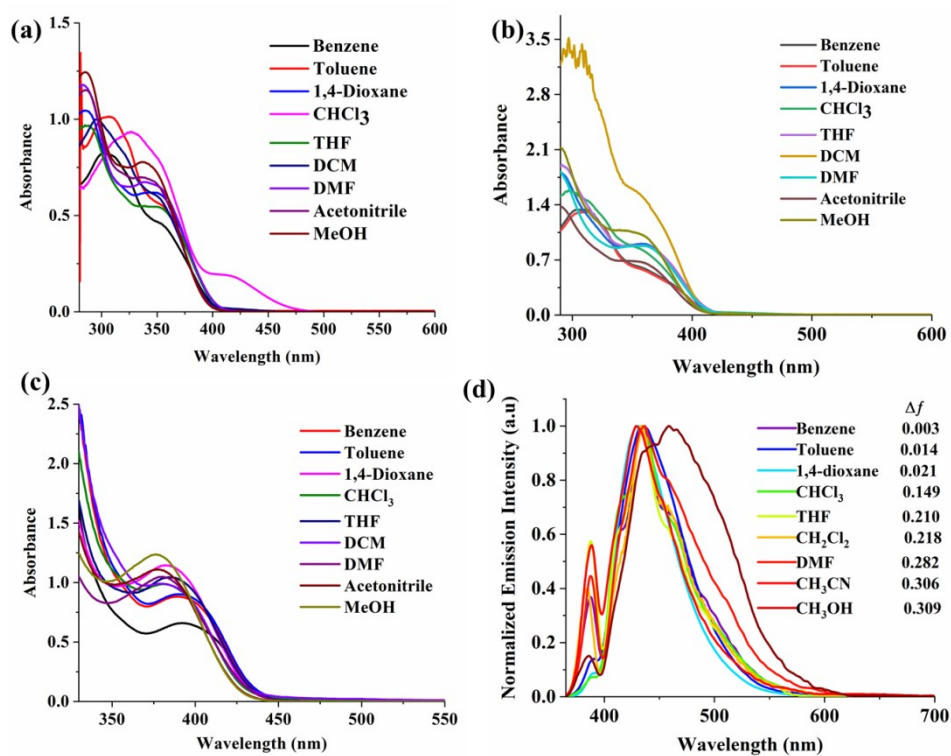

**Fig. S12** Absorption spectra of **Q1** (a), **Q2** (b), **Q3** (c) and emission spectrum of **Q1** (d) in solvents ( $c = 50 \mu\text{M}$ ) of varying polarity.

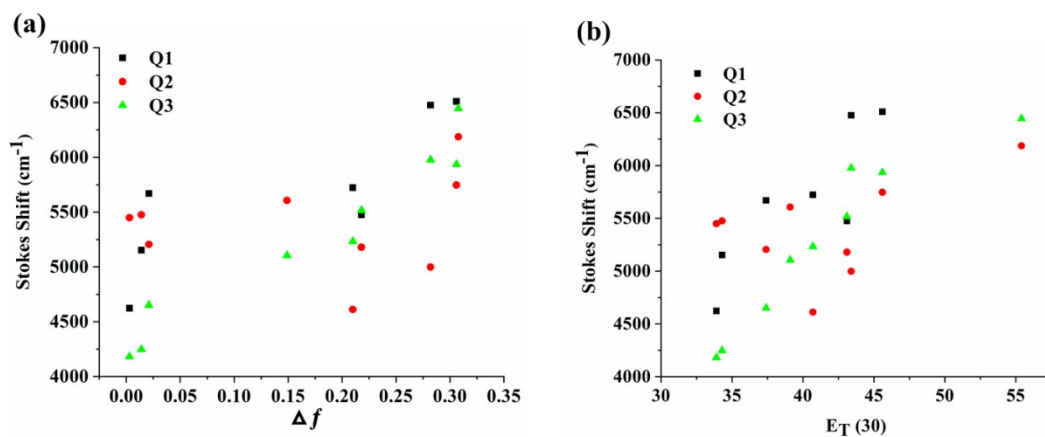

**Fig. S13** Plots between (a) Stokes shift vs.  $\Delta f$  and Stokes shift vs.  $E_T(30)$  (b).

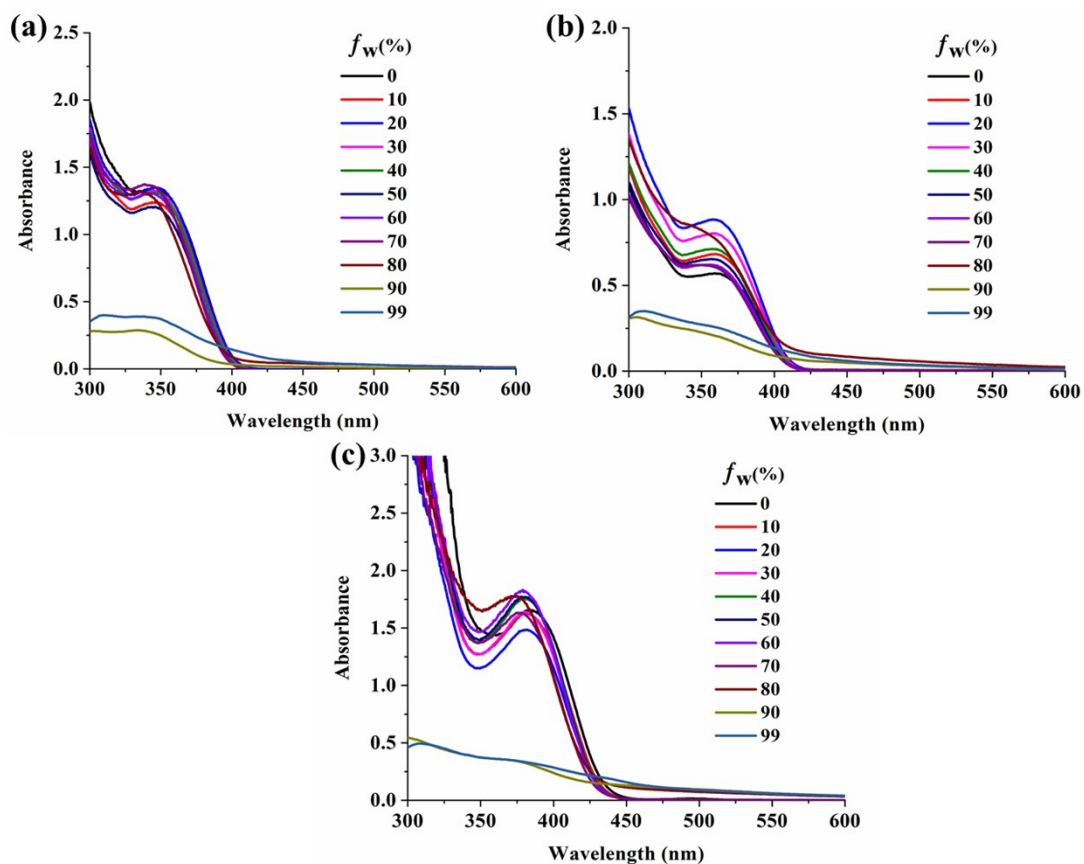

**Fig. S14** Absorption spectra of **Q1** (a), **Q2** (b) and **Q3** (c) in THF/water ( $c = 50 \mu\text{M}$ ).

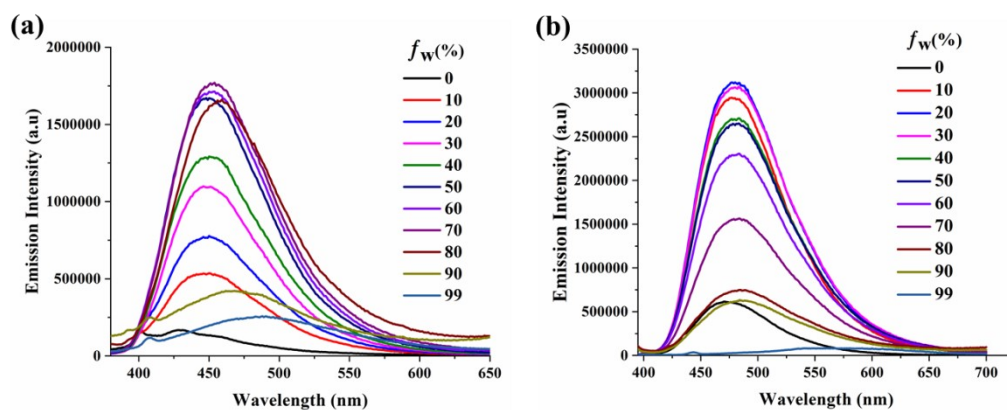

**Fig. S15** Emission spectra of **Q2** (a), and **Q3** (b) in THF/water ( $c = 50 \mu\text{M}$ ).

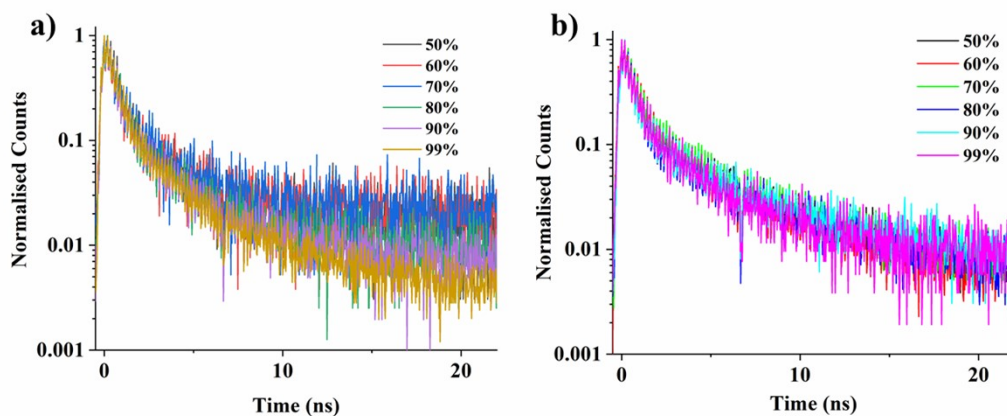

**Fig. S16** A logarithmic view of the time-resolved fluorescence of Q2 (a), Q3 (b) in THF/water mixture ( $c = 50 \mu\text{M}$ ).

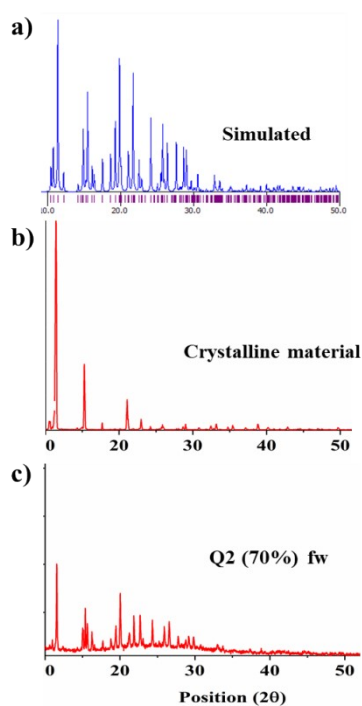

**Fig. S17** Powder XRD Pattern of (a) Q2 simulated (b) crystalline material of Q2 (c) Q2 70% fw.

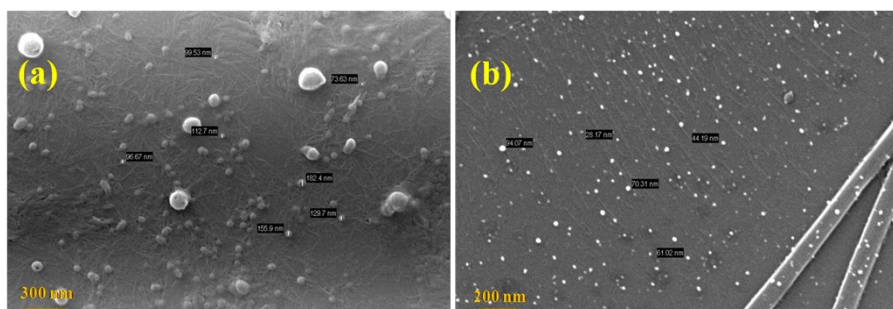

**Fig. S18** SEM images of Q2 (a) and Q3 (b) in THF/water mixture.

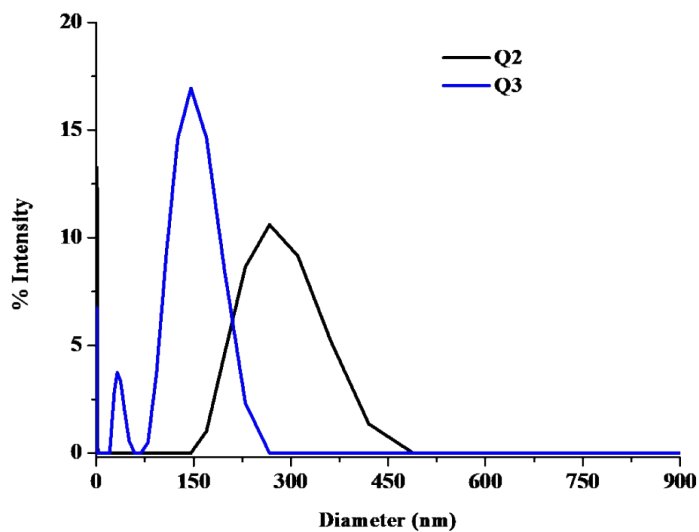

**Fig. S19** Dynamic light scattering for **Q2** (70% fw) and **Q3** (90% fw) in THF/water mixture.

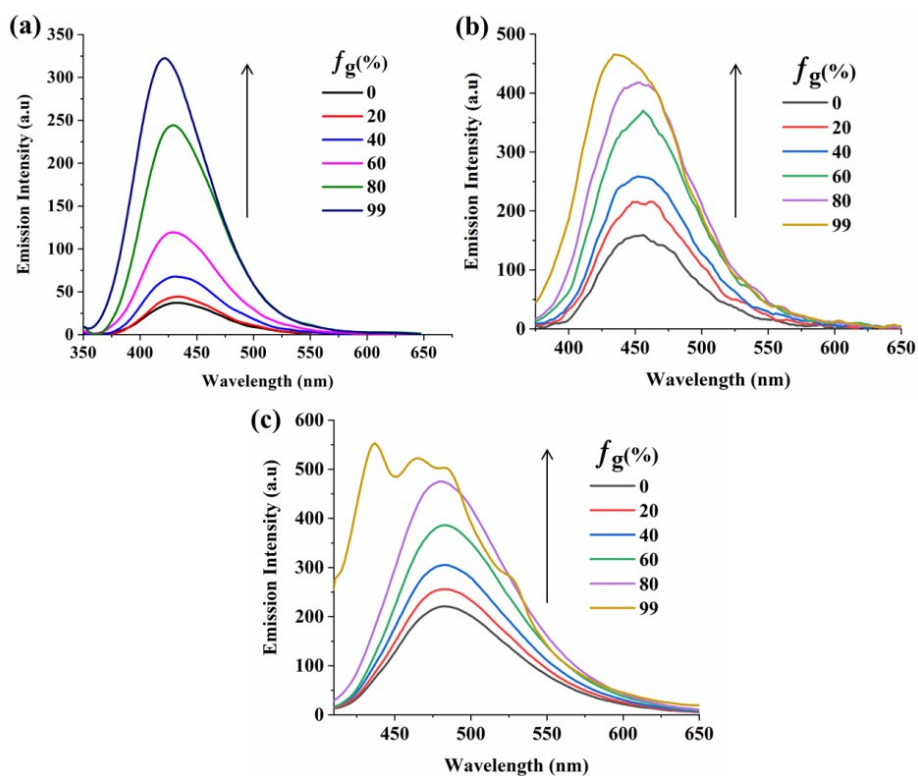

**Fig. S20** Emission spectra of **Q1** (a), **Q2** (b) and **Q3** (c) in methanol/glycerol ( $c = 50 \mu\text{M}$ ).



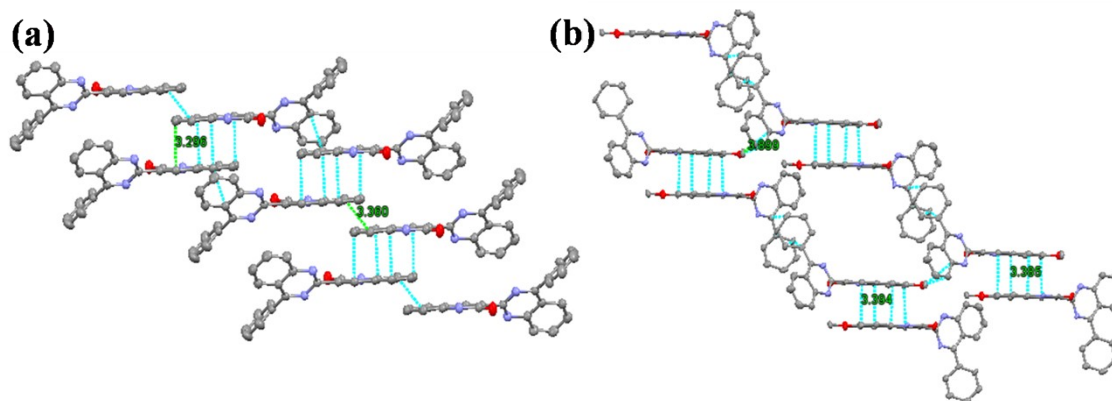

**Fig. S21** Crystal packing of **Q1** (a), and **Q3** (b) through  $\pi$ - $\pi$  stacking.

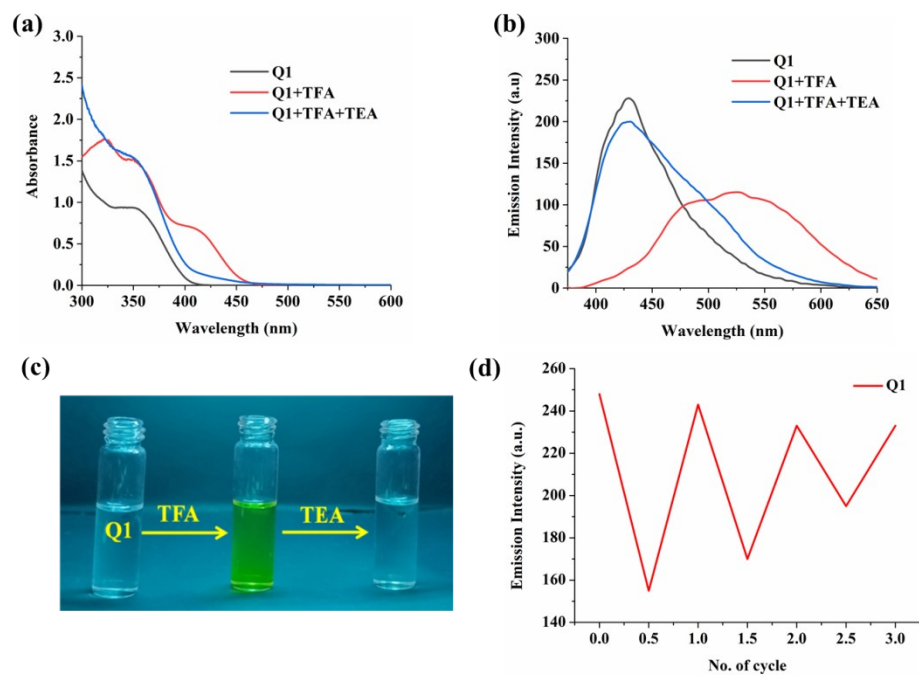

**Fig. S22** (a) Absorption spectrum of **Q1**, **Q1+TFA** and **Q1+TFA+TEA**. (b) Emission spectrum of **Q1**, **Q1+TFA** and **Q1+TFA+TEA**. (c) Images of **Q1** ( $c=5 \times 10^{-5}$  molL $^{-1}$ ) showing emission color changes after the addition of TFA and TEA, under the UV radiation of 365 nm. (d) Reversible switching of the emission of **Q1** by TFA/TEA cycle.

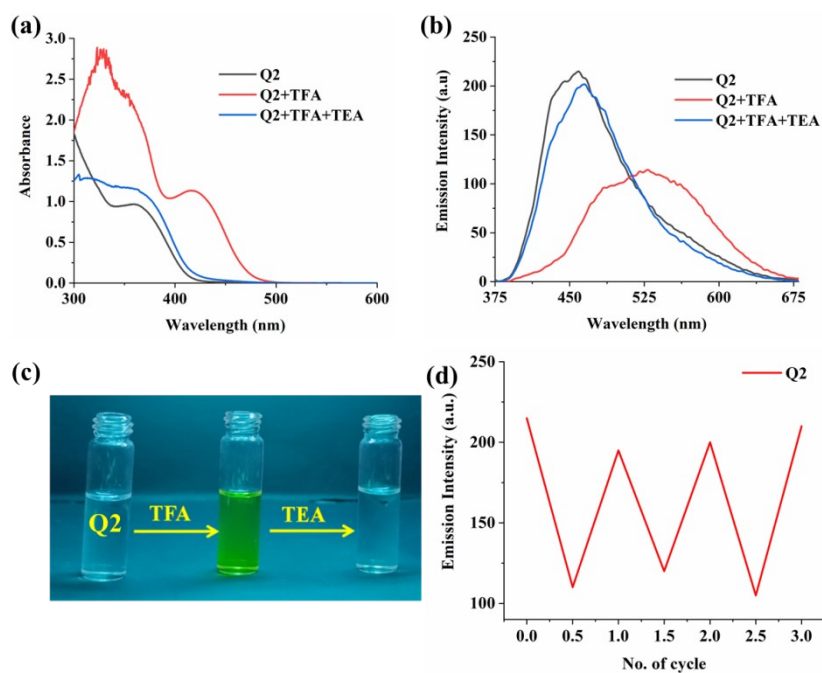

**Fig. S23** (a) Absorption spectrum of **Q2**, **Q2+TFA** and **Q2+TFA+TEA**. (b) Emission spectrum of **Q2**, **Q2+TFA** and **Q2+TFA+TEA**. (c) Images of **Q2** ( $c=5 \times 10^{-5}$  molL $^{-1}$ ) showing emission color changes after the addition of TFA and TEA, under the UV radiation of 365 nm. (d) Reversible switching of the emission of **Q2** by TFA/TEA cycle.

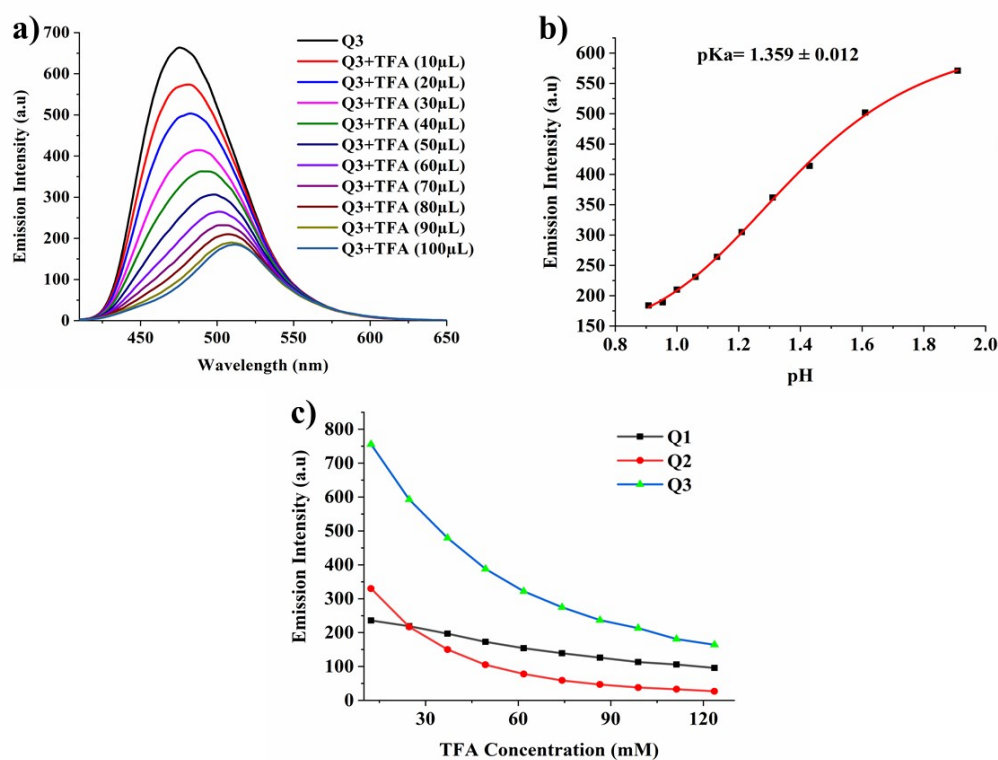

**Fig. S24** (a) Emission spectrum of **Q3**, with addition of TFA (10-100  $\mu$ L) **Q3**+TFA (b) calculation of pKa by performing pH dependent fluorescence titration of **Q3** in THF (c; 50  $\mu$ M) at different pH (1.91, 1.61, 1.43, 1.31, 1.21, 1.13, 1.06, 1, 0.95, 0.90) (c) quantitative relationship between TFA concentration and emission intensity of **Q1**, **Q2**, and **Q3**.

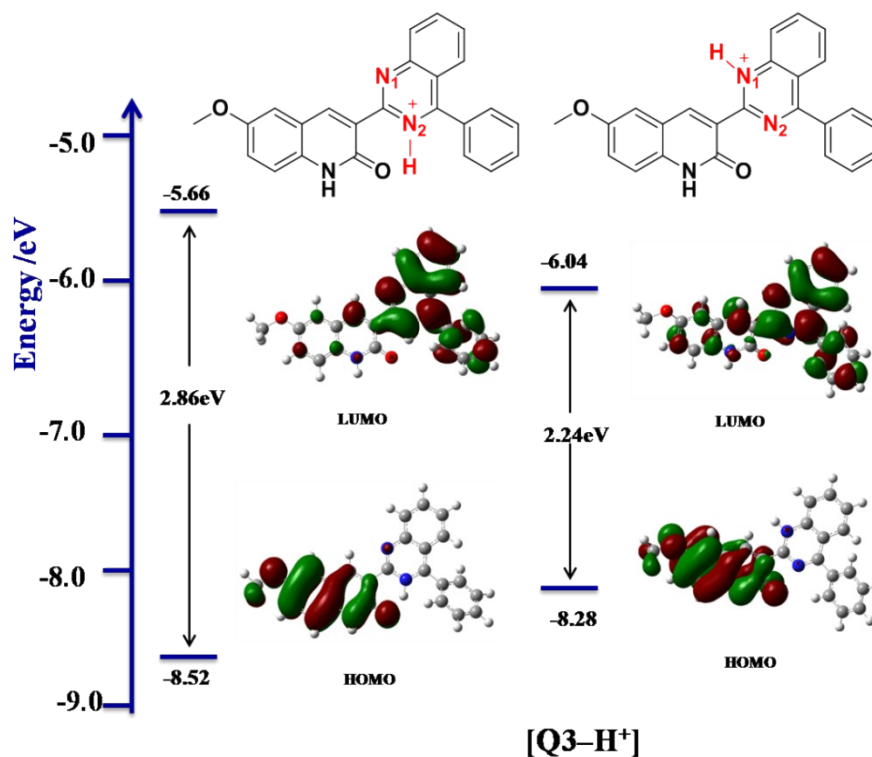

**Fig. S25** DFT optimized structure of **[Q3-H<sup>+</sup>]**.

**Table S1** Selected bond distances in **Q1**, **Q2** and **Q3**.

| Q1     | Bond Length (Å) | Q2     | Bond Length (Å) | Q3     | Bond Length (Å) |
|--------|-----------------|--------|-----------------|--------|-----------------|
| O1-C23 | 1.2363(15)      | O1-C10 | 1.243(2)        | O4-C10 | 1.237(8)        |
| N1-C7  | 1.3189(16)      | N2-C11 | 1.363(2)        | O2-C34 | 1.245(9)        |
| N1-C14 | 1.3613(16)      | N2-C14 | 1.325(2)        | O1-C26 | 1.371(9)        |
| N2-C14 | 1.3140(16)      | N1-C5  | 1.383(2)        | O1-C25 | 1.387(9)        |
| N2-C13 | 1.3726(16)      | N1-C10 | 1.364(2)        | O3-C2  | 1.356(10)       |
| N3-C23 | 1.3635(16)      | N3-C11 | 1.311(2)        | O3-C1  | 1.414(8)        |
| N3-C22 | 1.3806(17)      | N3-C12 | 1.365(2)        | N4-C29 | 1.390(9)        |
| C7-C8  | 1.4249(18)      | C11-C9 | 1.493(2)        | N4-C34 | 1.366(8)        |

|                |            |                |          |                |          |
|----------------|------------|----------------|----------|----------------|----------|
| <b>C7-C6</b>   | 1.4875(17) | <b>C9-C8</b>   | 1.347(2) | <b>N1-C10</b>  | 1.356(8) |
| <b>C8-C13</b>  | 1.4098(18) | <b>C9-C10</b>  | 1.456(3) | <b>N1-C7</b>   | 1.404(9) |
| <b>C8-C9</b>   | 1.4147(18) | <b>C5-C6</b>   | 1.401(3) | <b>N6-C35</b>  | 1.366(9) |
| <b>C17-C16</b> | 1.4292(17) | <b>C5-C4</b>   | 1.387(2) | <b>N6-C42</b>  | 1.335(9) |
| <b>C17-C22</b> | 1.3981(18) | <b>C6-C8</b>   | 1.426(3) | <b>N5-C35</b>  | 1.301(9) |
| <b>C17-C18</b> | 1.4042(18) | <b>C6-C7</b>   | 1.403(2) | <b>N5-C36</b>  | 1.355(9) |
| <b>C14-C15</b> | 1.4809(17) | <b>C14-C13</b> | 1.427(3) | <b>N3-C11</b>  | 1.374(9) |
| <b>C15-C23</b> | 1.4668(17) | <b>C14-C15</b> | 1.482(3) | <b>N3-C18</b>  | 1.317(9) |
| <b>C15-C16</b> | 1.3525(17) | <b>C13-C12</b> | 1.417(3) | <b>N2-C11</b>  | 1.292(8) |
| <b>C6-C1</b>   | 1.3861(19) | <b>C13-C21</b> | 1.414(3) | <b>N2-C12</b>  | 1.388(8) |
| <b>C6-C5</b>   | 1.376(2)   | <b>C15-C16</b> | 1.398(3) | <b>C35-C33</b> | 1.490(9) |

**Table S2** Selected bond angles in **Q1**, **Q2** and **Q3**.

| <b>Q1</b>          | <b>Bond angle (°)</b> | <b>Q2</b>         | <b>Bond angle (°)</b> | <b>Q3</b>          | <b>Bond angle (°)</b> |
|--------------------|-----------------------|-------------------|-----------------------|--------------------|-----------------------|
| <b>C14-N1-C7</b>   | 117.84(11)            | <b>C14-N2-C11</b> | 117.68(16)            | <b>C1-O3-C2</b>    | 117.6(6)              |
| <b>C13-N2-C14</b>  | 116.29(11)            | <b>C10-N1-C5</b>  | 125.33(18)            | <b>C7-N1-C10</b>   | 125.0(6)              |
| <b>C22-N3-C23</b>  | 125.56(12)            | <b>C12-N3-C11</b> | 116.17(16)            | <b>C18-N3-C11</b>  | 118.3(6)              |
| <b>C8-C7-N1</b>    | 121.52(12)            | <b>N3-C11-N2</b>  | 126.92(17)            | <b>C12-N2-C11</b>  | 117.3(6)              |
| <b>C6-C7-N1</b>    | 115.14(11)            | <b>C9-C11-N2</b>  | 114.84(16)            | <b>N2-C11-N3</b>   | 125.8(6)              |
| <b>C6-C7-C8</b>    | 123.05(11)            | <b>C9-C11-N3</b>  | 118.17(16)            | <b>C9-C11-N3</b>   | 114.5(6)              |
| <b>C13-C8-C7</b>   | 115.93(11)            | <b>C8-C9-C11</b>  | 120.37(16)            | <b>C9-C11-N2</b>   | 119.7(6)              |
| <b>C9-C8-C7</b>    | 124.80(12)            | <b>C10-C9-C11</b> | 118.78(17)            | <b>C12-C17-C18</b> | 116.7(7)              |
| <b>C9-C8-C13</b>   | 119.00(12)            | <b>C10-C9-C8</b>  | 120.84(17)            | <b>C16-C17-C18</b> | 125.5(7)              |
| <b>C22-C17-C16</b> | 117.60(11)            | <b>C6-C5-N1</b>   | 119.12(17)            | <b>C16-C17-C12</b> | 117.7(7)              |
| <b>C18-C17-C16</b> | 123.72(12)            | <b>C4-C5-N1</b>   | 121.25(17)            | <b>N1-C10-O4</b>   | 121.4(7)              |
| <b>C18-C17-C22</b> | 118.64(12)            | <b>C4-C5-C6</b>   | 119.62(18)            | <b>C9-C10-O4</b>   | 122.7(6)              |
| <b>N2-C14-N1</b>   | 126.49(12)            | <b>C8-C6-C5</b>   | 117.24(17)            | <b>C9-C10-N1</b>   | 115.9(6)              |
| <b>C15-C14-N1</b>  | 116.16(11)            | <b>C7-C6-C5</b>   | 118.78(18)            | <b>C4-C7-N1</b>    | 120.5(7)              |
| <b>C15-C14-N2</b>  | 117.34(11)            | <b>C7-C6-C8</b>   | 123.98(18)            | <b>C6-C7-N1</b>    | 118.6(6)              |
| <b>C23-C15-C14</b> | 118.39(11)            | <b>C13-C14-N2</b> | 120.96(17)            | <b>C6-C7-C4</b>    | 120.8(7)              |

|                    |            |                    |            |                    |          |
|--------------------|------------|--------------------|------------|--------------------|----------|
| <b>C16-C15-C14</b> | 121.63(11) | <b>C15-C14-N2</b>  | 115.93(16) | <b>C10-C9-C11</b>  | 119.2(6) |
| <b>C16-C15-C23</b> | 119.84(12) | <b>C15-C14-C13</b> | 123.10(17) | <b>C8-C9-C11</b>   | 120.0(7) |
| <b>N3-C23-O1</b>   | 120.28(12) | <b>C6-C8-C9</b>    | 122.23(18) | <b>C8-C9-C10</b>   | 120.7(6) |
| <b>C15-C23-O1</b>  | 124.23(12) | <b>C12-C13-C14</b> | 116.06(17) | <b>C3-C4-C7</b>    | 119.5(7) |
| <b>C15-C23-N3</b>  | 115.46(11) | <b>C21-C13-C14</b> | 125.26(17) | <b>C8-C6-C7</b>    | 117.6(7) |
| <b>C1-C6-C7</b>    | 117.20(12) | <b>C21-C13-C12</b> | 118.62(17) | <b>C5-C6-C7</b>    | 118.4(7) |
| <b>C5-C6-C7</b>    | 123.66(13) | <b>N1-C10-O1</b>   | 120.80(18) | <b>C5-C6-C8</b>    | 124.0(7) |
| <b>C5-C6-C1</b>    | 119.14(13) | <b>C9-C10-O1</b>   | 124.02(18) | <b>C2-C3-C4</b>    | 121.0(7) |
| <b>C15-C16-C17</b> | 122.51(12) | <b>C9-C10-N1</b>   | 115.17(18) | <b>C17-C18-N3</b>  | 120.9(7) |
| <b>C17-C22-N3</b>  | 118.89(12) | <b>C16-C15-C14</b> | 118.77(17) | <b>C19-C18-N3</b>  | 115.2(6) |
| <b>C21-C22-N3</b>  | 120.68(12) | <b>C20-C15-C14</b> | 122.87(18) | <b>C19-C18-C17</b> | 123.9(7) |
| <b>C21-C22-C17</b> | 120.41(12) | <b>C20-C15-C16</b> | 118.27(17) | <b>C6-C8-C9</b>    | 122.2(7) |
| <b>C8-C13-N2</b>   | 121.87(11) | <b>C13-C12-N3</b>  | 121.98(17) | <b>C20-C19-C18</b> | 122.6(7) |
| <b>C12-C13-N2</b>  | 118.81(12) | <b>C24-C12-N3</b>  | 118.70(18) | <b>C24-C19-C18</b> | 117.5(7) |
| <b>C12-C13-C8</b>  | 119.17(12) | <b>C24-C12-C13</b> | 119.27(19) | <b>C24-C19-C20</b> | 119.8(7) |

**Table S3** Molar extinction coefficient ( $\epsilon$ ) for **Q1**, **Q2**, and **Q3** (c; 50  $\mu$ M)

| <b>Compounds</b> | <b>Absorption maxima</b> | <b>Molar extinction Coefficient (<math>\epsilon</math>)</b> |
|------------------|--------------------------|-------------------------------------------------------------|
| Q1               | 337                      | $2.40 \times 10^5 \text{ M}^{-1} \text{ cm}^{-1}$           |
| Q2               | 358                      | $2.35 \times 10^5 \text{ M}^{-1} \text{ cm}^{-1}$           |
| Q3               | 385                      | $2.09 \times 10^5 \text{ M}^{-1} \text{ cm}^{-1}$           |

**Table S4** Emission maxima ( $\lambda_{em}$ ) in the solid-state for **Q1**, **Q2**, and **Q3**.

| <b>Compounds</b> | <b>Emission maxima ( THF solution)</b> | <b>Emission maxima (Solid state)</b> |
|------------------|----------------------------------------|--------------------------------------|
| Q1               | 433                                    | 459                                  |
| Q2               | 440                                    | 505                                  |
| Q3               | 463                                    | 518                                  |

**Table S5** Absorption and emissions maxima for **Q1**, **Q2**, and **Q3** in THF/water mixtures.

| Water (vol %) | Q1                |                   | Q2                |                   | Q3                |                   |
|---------------|-------------------|-------------------|-------------------|-------------------|-------------------|-------------------|
|               | $\lambda_{ab}/nm$ | $\lambda_{em}/nm$ | $\lambda_{ab}/nm$ | $\lambda_{em}/nm$ | $\lambda_{ab}/nm$ | $\lambda_{em}/nm$ |
| 0             | 337               | 401               | 358               | 429               | 385               | 465               |
| 10 to 80      | 346               | 438               | 355               | 450               | 382               | 483               |
| 90            | 306-333           | 480               | 303-358           | 462               | 285-298           | 488               |
| 99            | 309-337           | 499               | 311-358           | 490               | 286-305           | -----             |

**Table S6** Fluorescence quantum yield ( $\Phi_f$ ) for **Q1** at different water fractions ( $f_w$ ) in THF/water mixtures.

| Water fraction (vol %) | Fluorescence quantum yield ( $\Phi_f$ ) Q1 |
|------------------------|--------------------------------------------|
| 0%-40%                 | 0.005                                      |
| 50%-60%                | 0.010                                      |
| 70%                    | 0.013                                      |
| 80%                    | 0.022                                      |
| 90%                    | 0.191                                      |
| 99%                    | 0.073                                      |

Fluorescence quantum yield ( $\Phi_f$ ) for **Q1** have been calculated relative to quinine sulphate (THF,  $\lambda_{ex} = 310$  nm,  $\lambda_{em} = 358$  nm,  $\Phi = 0.55$ ) as a reference using the formula  $[(\Phi = \Phi_R \times (I_T/I_R) \times (A_R/A_T) \times (\eta_T^2 / \eta_R^2)]$ , where  $\Phi$  = quantum yield,  $I$  = area under the curve of emission spectrum,  $A$  = absorbance at  $\lambda_{ex}$ ,  $\eta$  = refractive index of solvent; The subscript R and T denote values for the reference and test samples respectively. Stock solutions for **Q1** have been prepared in THF; error  $\pm 5\%$ .

**Table S7** Average life time ( $\tau_{avg.}$ ) for **Q1** at water fractions ( $f_w$ ) from 50%-99% in THF/water mixtures.

| Q1 (Water vol %) | $\tau_1$ (ns) | $\tau_2$ (ns) | A1    | A2    | $\tau_{avg.}$ | R <sup>2</sup> |
|------------------|---------------|---------------|-------|-------|---------------|----------------|
| 50               | 0.272         | 2.328         | 0.685 | 0.091 | 0.515         | 0.888          |

|           |       |       |       |       |       |       |
|-----------|-------|-------|-------|-------|-------|-------|
| <b>60</b> | 0.446 | 2.918 | 0.724 | 0.060 | 0.546 | 0.917 |
| <b>70</b> | 0.444 | 2.210 | 0.702 | 0.074 | 0.612 | 0.935 |
| <b>80</b> | 0.433 | 2.479 | 0.617 | 0.149 | 0.751 | 0.914 |
| <b>90</b> | 0.811 | 2.315 | 0.629 | 0.219 | 1.199 | 0.923 |
| <b>99</b> | 0.607 | 2.168 | 0.689 | 0.189 | 0.943 | 0.927 |

**Table S8** Average life time ( $\tau_{\text{avg.}}$ ) for **Q2** at water fractions ( $f_w$ ) from 50%-99% in THF/water mixtures.

| <b>Q2 (Water vol %)</b> | <b><math>\tau_1</math> (ns)</b> | <b><math>\tau_2</math> (ns)</b> | <b>A1</b> | <b>A2</b> | <b><math>\tau_{\text{avg.}}</math></b> | <b>R<sup>2</sup></b> |
|-------------------------|---------------------------------|---------------------------------|-----------|-----------|----------------------------------------|----------------------|
| <b>50</b>               | 0.437                           | 2.789                           | 0.671     | 0.092     | 0.722                                  | 0.902                |
| <b>60</b>               | 0.499                           | 3.246                           | 0.736     | 0.073     | 0.748                                  | 0.935                |
| <b>70</b>               | 0.413                           | 2.360                           | 0.609     | 0.132     | 0.871                                  | 0.907                |
| <b>80</b>               | 0.399                           | 2.609                           | 0.596     | 0.101     | 0.720                                  | 0.918                |
| <b>90</b>               | 0.468                           | 2.925                           | 0.727     | 0.078     | 0.708                                  | 0.924                |
| <b>99</b>               | 0.336                           | 1.854                           | 0.550     | 0.163     | 0.684                                  | 0.889                |

**Table S9** Average life time ( $\tau_{\text{avg.}}$ ) for **Q3** at water fractions ( $f_w$ ) from 50%-99% in THF/water mixtures.

| <b>Q3 (Water vol %)</b> | <b><math>\tau_1</math> (ns)</b> | <b><math>\tau_2</math> (ns)</b> | <b>A1</b> | <b>A2</b> | <b><math>\tau_{\text{avg.}}</math></b> | <b>R<sup>2</sup></b> |
|-------------------------|---------------------------------|---------------------------------|-----------|-----------|----------------------------------------|----------------------|
| <b>50</b>               | 0.515                           | 3.95                            | 0.668     | 0.118     | 1.033                                  | 0.924                |
| <b>60</b>               | 0.487                           | 4.135                           | 0.713     | 0.104     | 0.953                                  | 0.928                |
| <b>70</b>               | 0.428                           | 2.586                           | 0.560     | 0.150     | 0.885                                  | 0.926                |
| <b>80</b>               | 0.341                           | 2.803                           | 0.533     | 0.132     | 0.830                                  | 0.911                |
| <b>90</b>               | 0.478                           | 2.829                           | 0.651     | 0.113     | 0.822                                  | 0.920                |
| <b>99</b>               | 0.361                           | 3.066                           | 0.585     | 0.115     | 0.806                                  | 0.919                |
